# Supplementary material for: Improving the in vivo stability and sensor lifetime with new blend membranes on CGM sensors
Source: Royal Society of Chemistry journal article supplement (doi:10.1039/d4lp00123k), 2024-01-01
Supplement: d4lp00123k1.pdf [file d4lp00123k1.pdf]

**Table S1** The water adsorption rate and membrane expansion rate of blending polymers of PDMS/HT.

| Polymer sample | Water adsorption rate (72h) | Membrane expansion rate (72h) |
|----------------|-----------------------------|-------------------------------|
| PDMS/HT 10:50  | 27.8%                       | 32.5%                         |

**Table S2** Samples of PDMS/HT with different PDMS percentages with the corresponding sensitivity and membrane thickness.

| Sample        | Sensitivity<br>(nA/mM) | Membrane thickness ( $\mu\text{m}$ )<br>n = 3 | Response time<br>(s) |
|---------------|------------------------|-----------------------------------------------|----------------------|
| PDMS/HT 10:50 | 3.88                   | 44.7 $\pm$ 1.5                                | 30                   |

**Table S3** The sensitivity of the glucose sensor before and after sterilization.

|           | Sensitivity before sterilization<br>(nA/mM) | Sensitivity after sterilization<br>(nA/mM) |
|-----------|---------------------------------------------|--------------------------------------------|
| Sensor 1# | 3.88                                        | 3.85                                       |
| Sensor 2# | 3.79                                        | 3.72                                       |
| Sensor 3# | 3.76                                        | 3.72                                       |
| Sensor 4# | 3.83                                        | 3.81                                       |
| Sensor 5# | 3.85                                        | 3.88                                       |

**Table S4** The sensitivity of nine sensors before implantation (in vitro sensitivity) and explanted from beagles after 31 days of implantation were tested in PBS at 32.0 °C.

| Electrode number | In vitro sensitivity (nA/mM) | Sensitivity explanted from beagles after 31 days of implantation and tested in PBS (nA/mM) |
|------------------|------------------------------|--------------------------------------------------------------------------------------------|
| 1                | 3.89                         | 3.85                                                                                       |
| 2                | 3.87                         | 3.83                                                                                       |
| 3                | 3.85                         | 3.88                                                                                       |
| 4                | 3.82                         | 3.75                                                                                       |
| 5                | 3.80                         | 3.68                                                                                       |
| 6                | 3.88                         | 3.59                                                                                       |
| 7                | 3.85                         | 3.81                                                                                       |
| 8                | 3.82                         | 3.73                                                                                       |
| 9                | 3.89                         | 3.76                                                                                       |

**Table S5** Consensus error grid results for the cases without recalibration.

| Zone  | A    | B    | C | D | E |
|-------|------|------|---|---|---|
|       | 713  | 97   | 0 | 0 | 0 |
| %Freq | 88.0 | 12.0 | 0 | 0 | 0 |

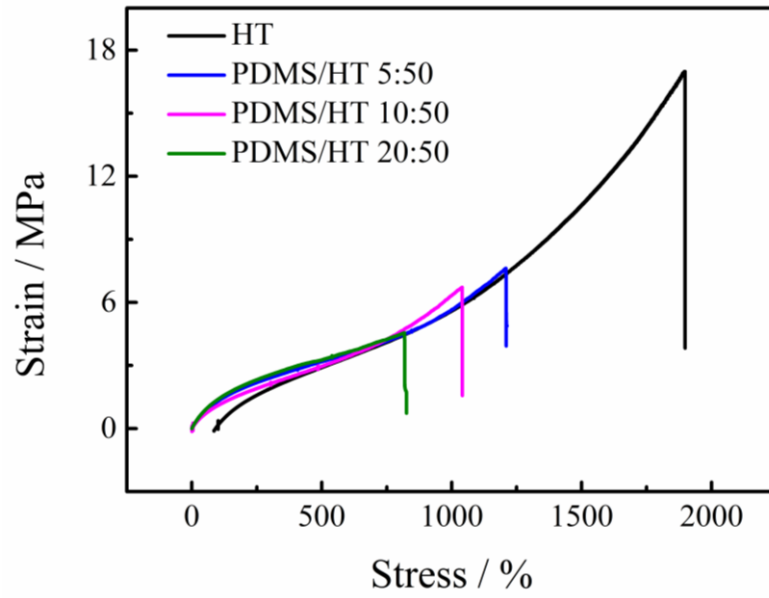

**Fig. S1** Tensile behavior of PDMS/HT samples with different weight ratios.

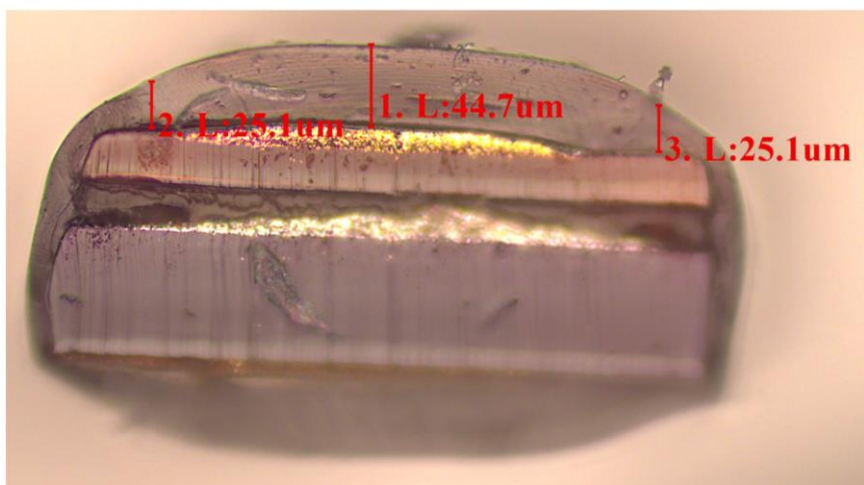

**Fig. S2** Samples of PDMS/HT with the weight ratio of 10:50 and the corresponding outer membrane thickness.

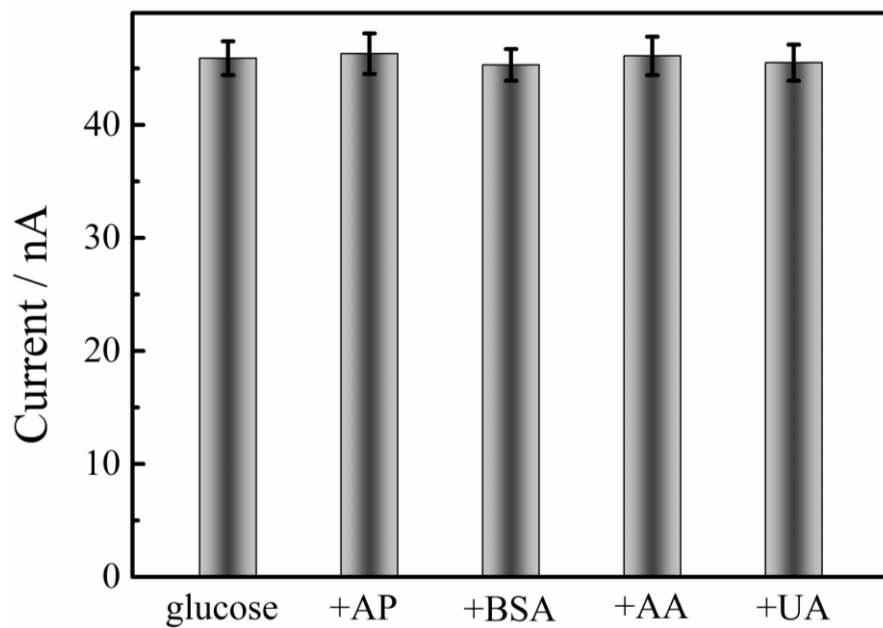

**Fig. S3** Test results of 10 mM glucose (pH 7.4,  $32.0 \pm 0.5$  °C) containing interfering substances, including 0.17 mM AP, 22 mg/mL BSA, 0.11 mM AA, 0.48 mM UA.



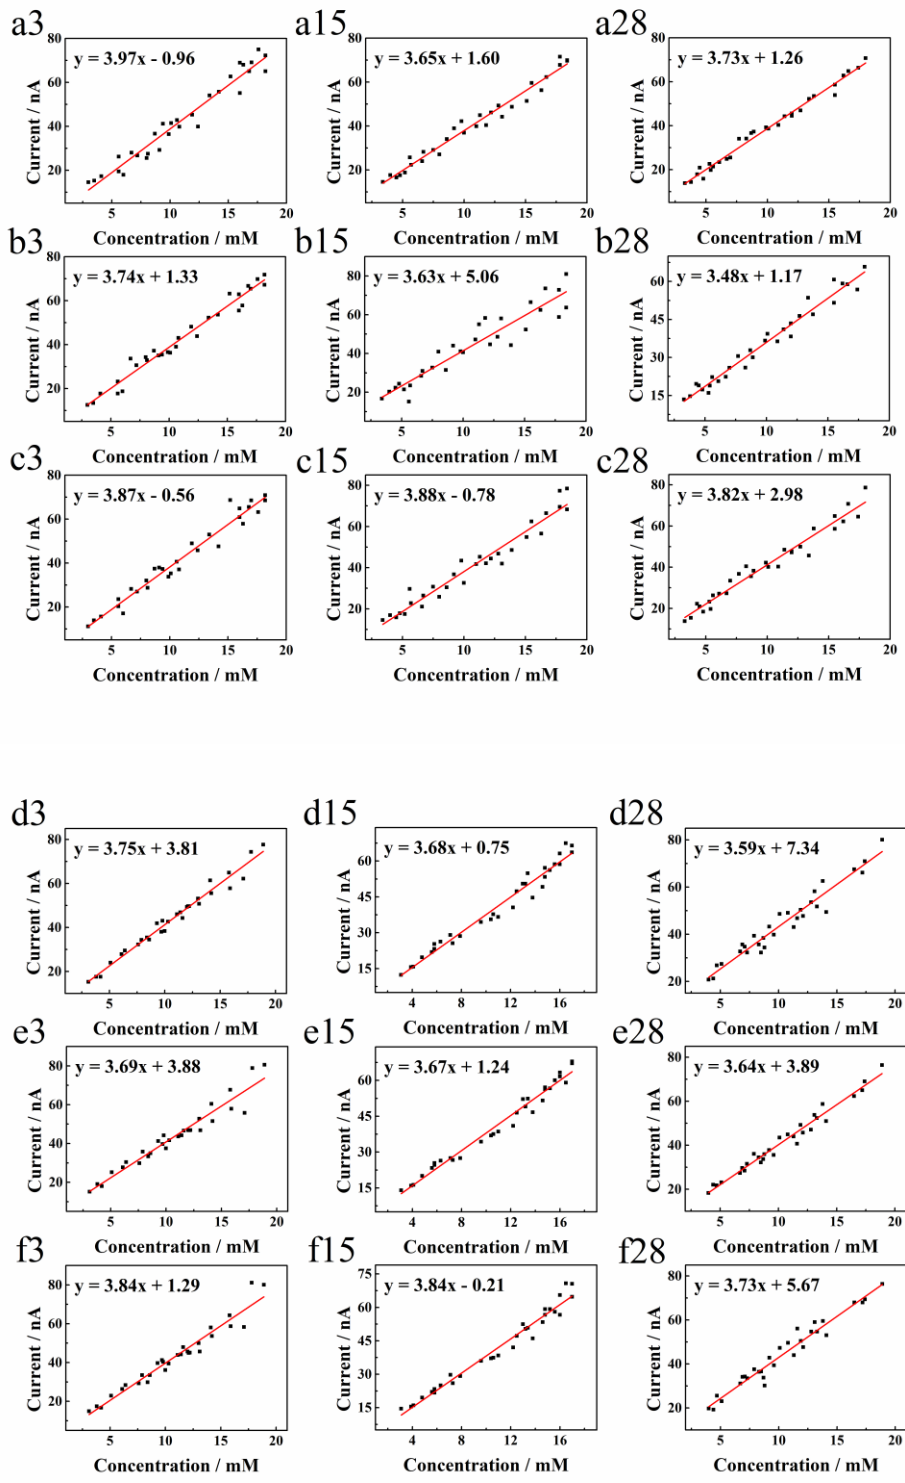

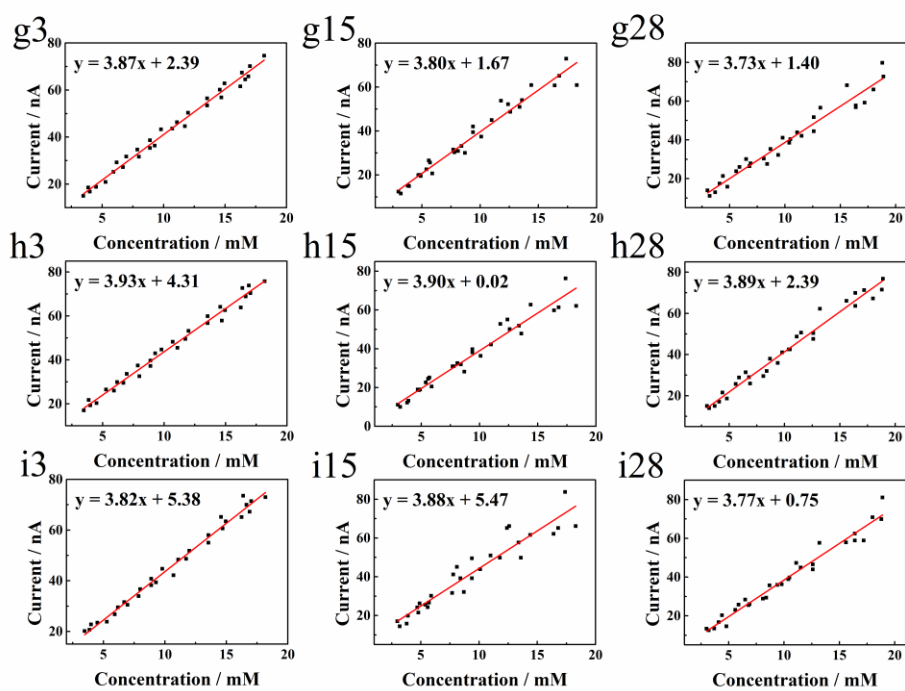

**Fig. S4** The in vivo sensitivity of nine glucose sensors in 3 beagles on days 3, 15, and 28. Sensors a, b, and c were worn on beagle 1; Sensors d, e, and f were worn on beagle 2; Sensors g, h, and i were worn on beagle 3. a3, a15, and a28 represent sensor a was worn on dog 1 on day 3, day 15, and day 28.

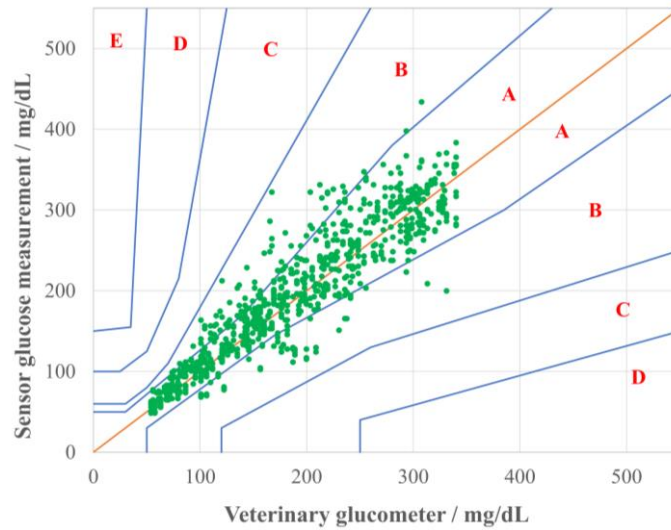

**Fig. S5** Consensus error grids of the interstitial glucose concentration measured by CGMS sensors implanted at the neck of the beagles and the blood glucose concentration measured by using a veterinary glucometer in each of the 3 beagles. Zones for consensus error grid analysis are as follows: A = no effect on clinical action, B = altered clinical action unlikely to affect the outcome, C = altered clinical action likely to affect clinical outcome, D = altered clinical action that could pose a serious medical risk, and E = altered clinical action that could have dangerous consequences.
